# Supplementary material for: Dual-Targeting Gold Nanoparticles: Simultaneous Decoration with Ligands for Co-Transporters SGLT-1 and B0AT1
Source: MDPI journal article supplement (doi:10.3390/app14062248), 2024-03-07

---

# Dual-targeting gold nanoparticles: simultaneous decoration with ligands for co-transporters SGLT-1 and B<sup>0</sup>AT1

Giuseppe D'Orazio, Marco Marradi and Barbara La Ferla

## Supplementary Materials

- FT-IR spectra of AuNP1, AuNP2, AuNP3 and AuNP4 p. 2-3
- NMR spectra of selected compounds p. 4-15

## FT-IR spectra of AuNP1, AuNP2, AuNP3 and AuNP4

## AuNP1

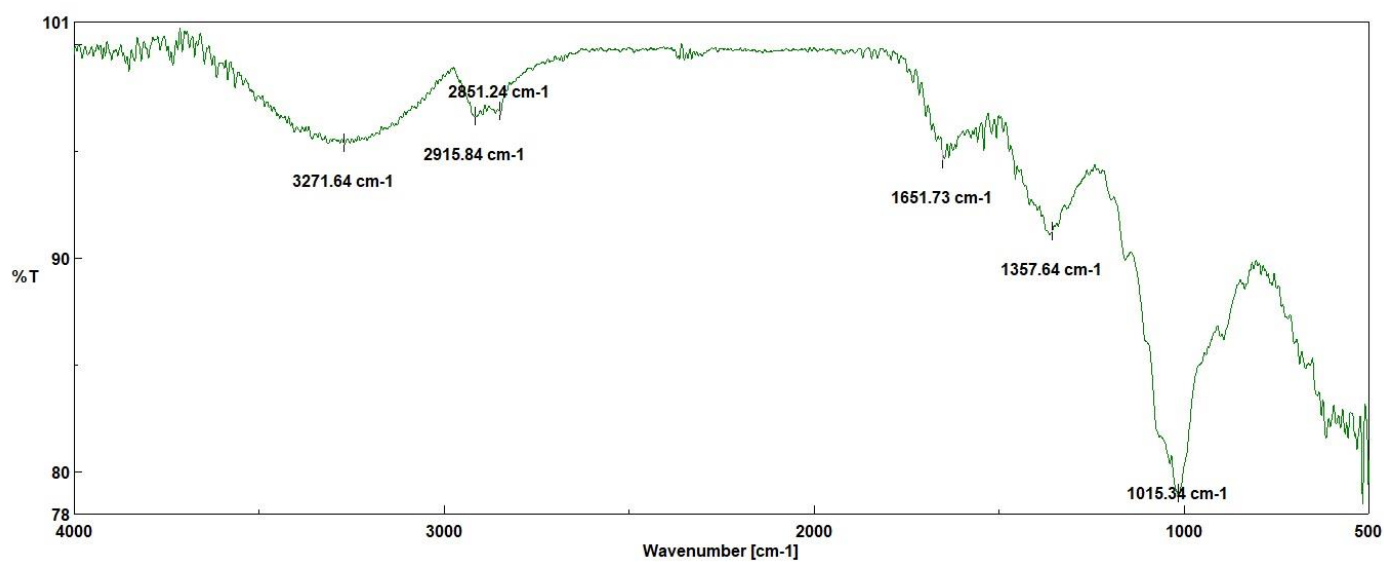

## AuNP2

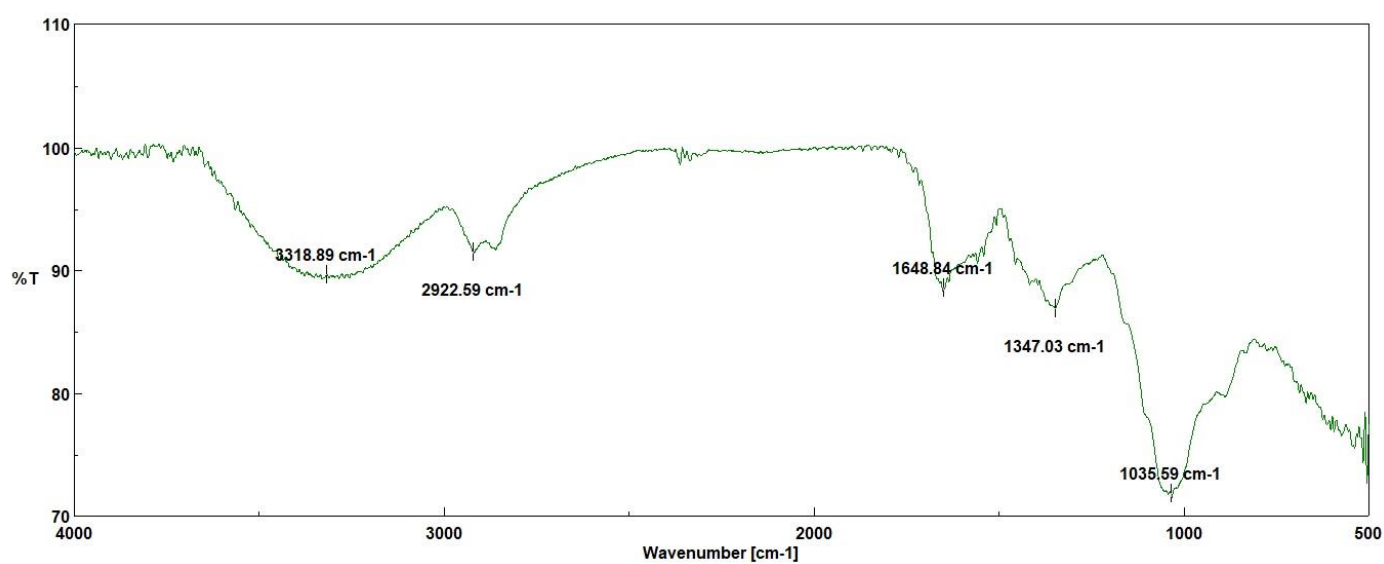

**AuNP3**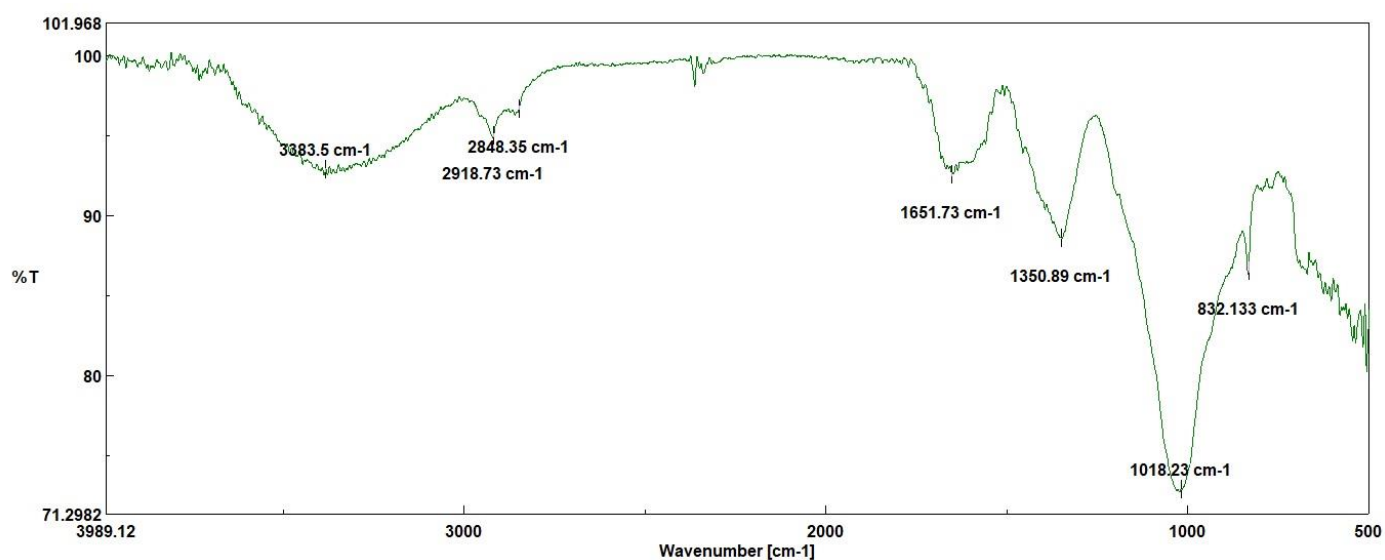**AuNP4**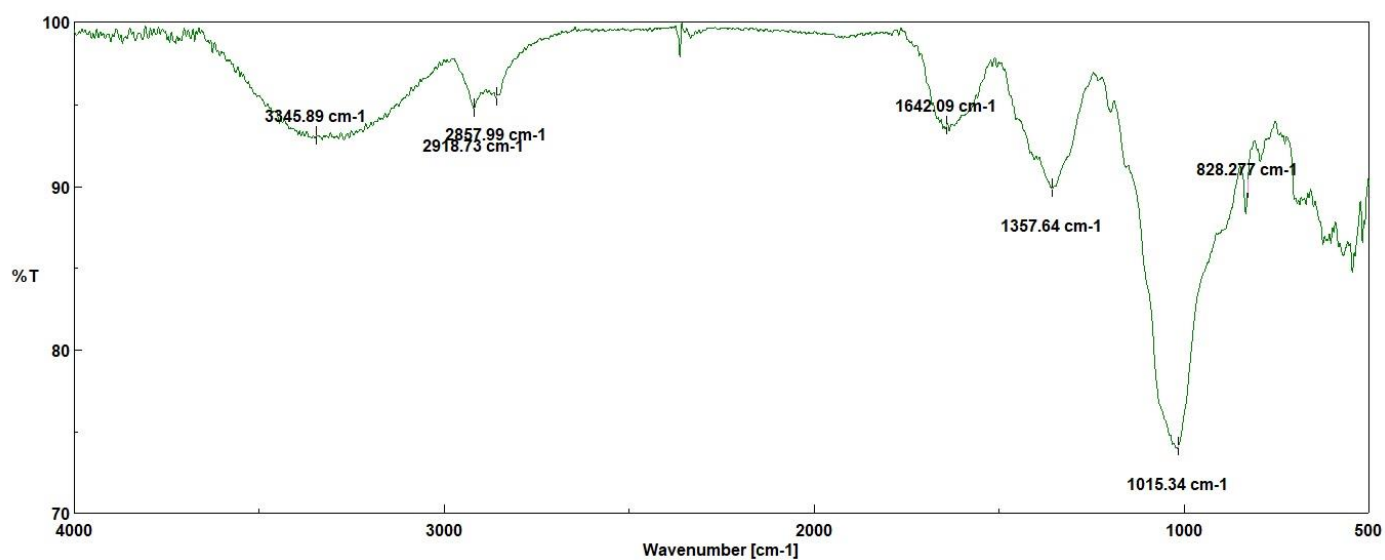

**<sup>1</sup>H-NMR spectra of synthesized compounds.**

- Compound 2
- Compound 4
- Compound 8
- Compound 9
- Compound 10
- Compound 11
- Compound 12
- Compound 13
- Compound 14
- Compound 15
- Compound 16
- Compound 17
- Compound 18
- Compound 19
- Compound 20
- Compound 21
- Compound 22
- Compound 23
- Compound 24
- Compound 25
- Compound 26

**Compound 2**<sup>1</sup>H-NMR (400 MHz, CD<sub>3</sub>OD)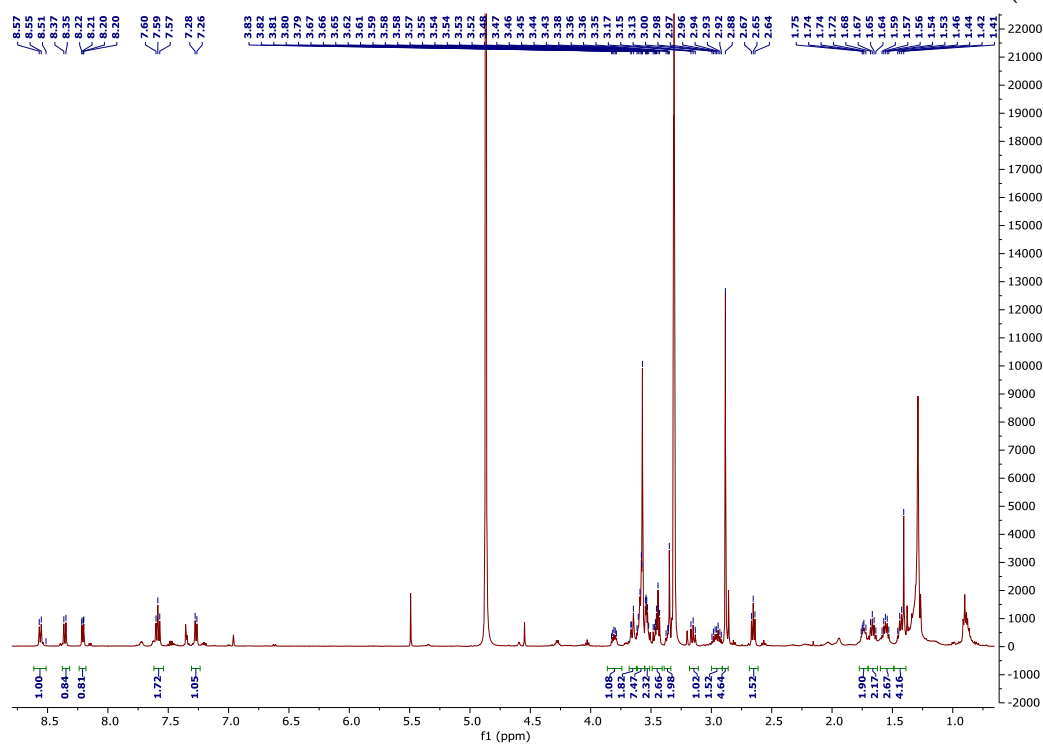**Compound 4**<sup>1</sup>H-NMR (400 MHz, CDCl<sub>3</sub>)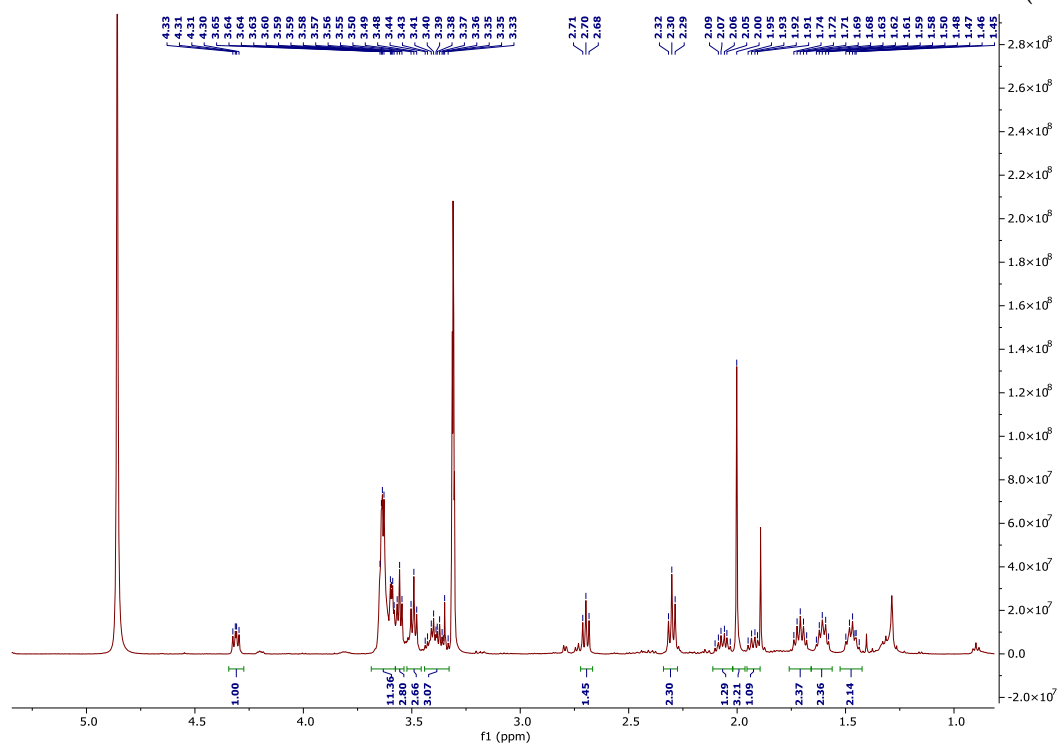

**Compound 8** $^1\text{H-NMR}$  (400 MHz,  $\text{CDCl}_3$ )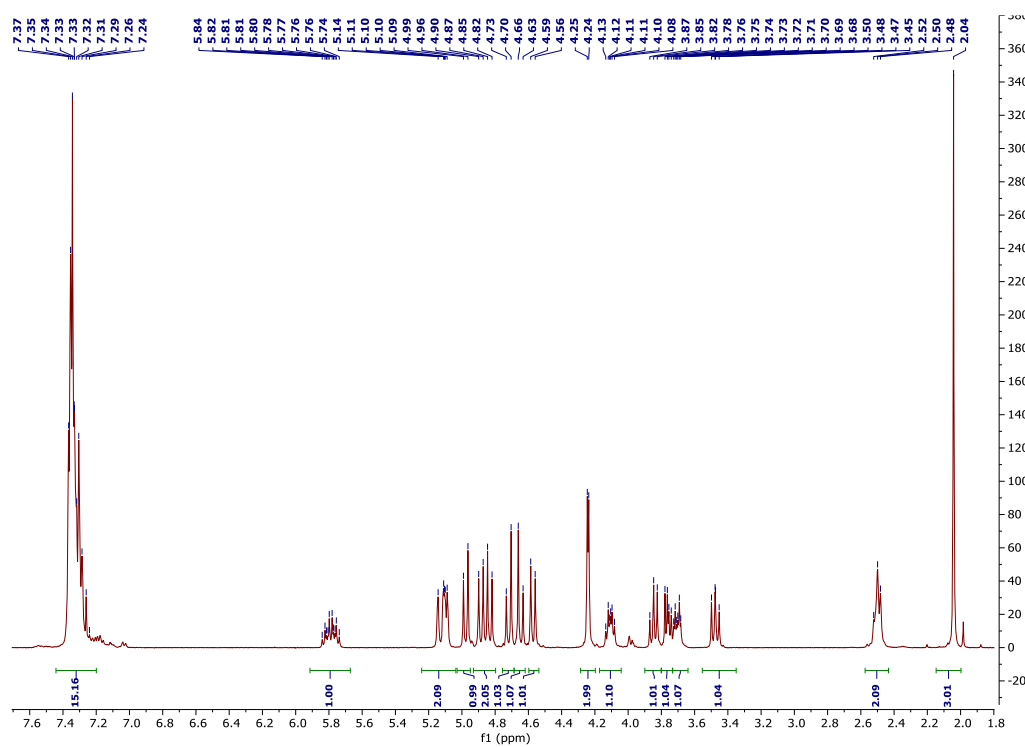**Compound 9** $^1\text{H-NMR}$  (400 MHz,  $\text{CDCl}_3$ )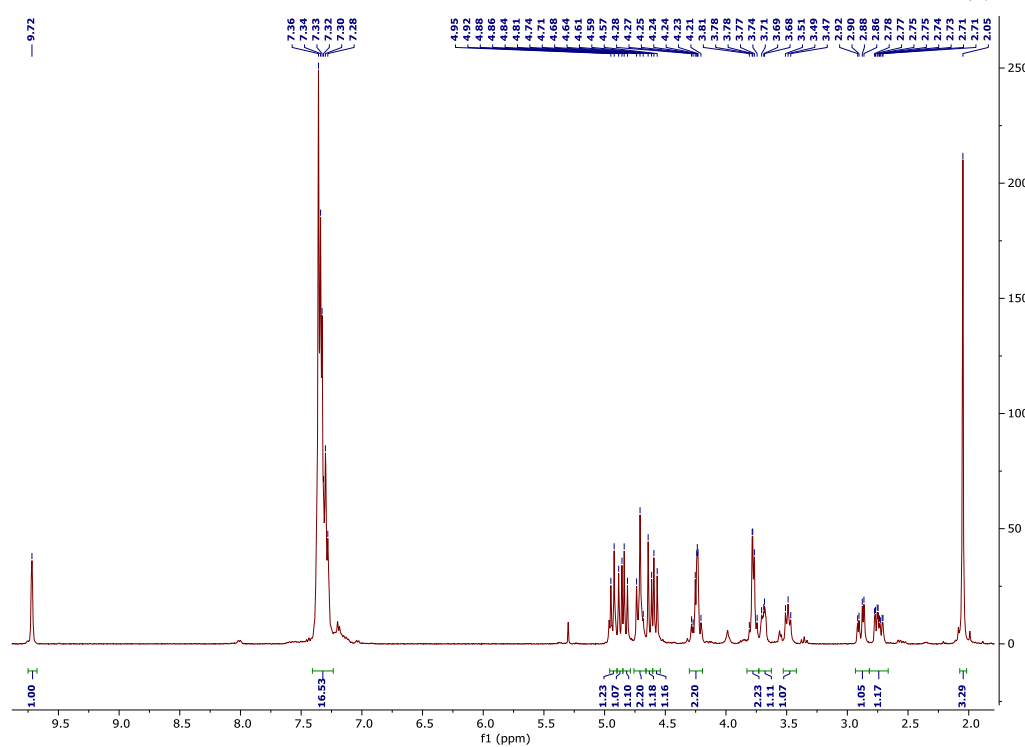

**Compound 10**<sup>1</sup>H-NMR (400 MHz, CDCl<sub>3</sub>)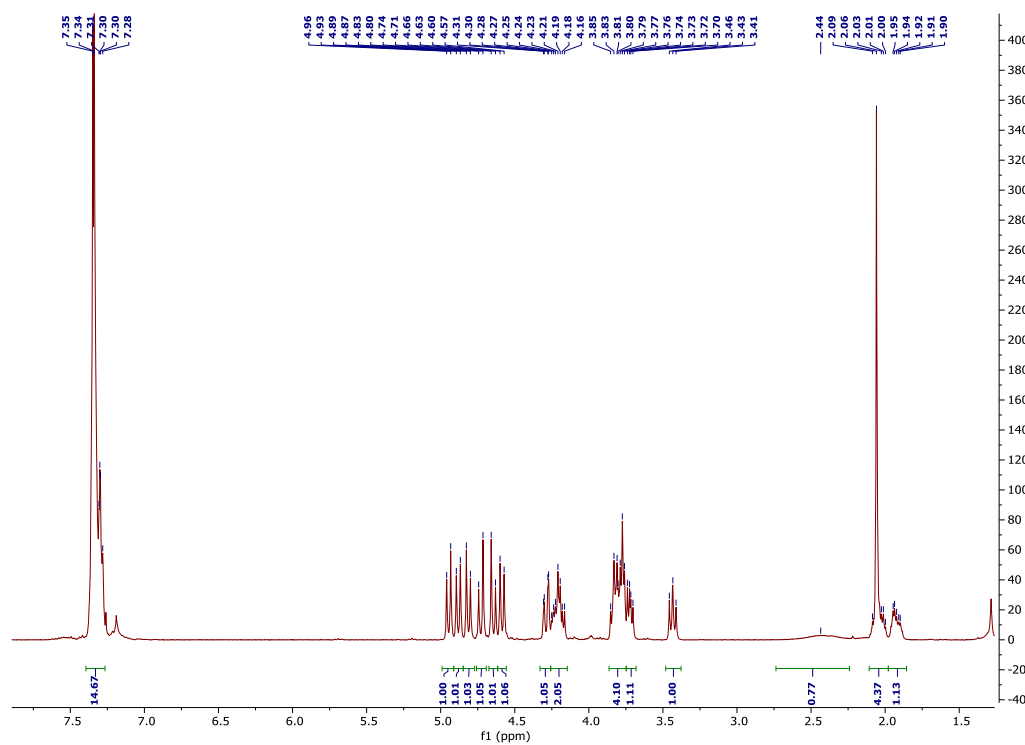**Compound 11**<sup>1</sup>H-NMR (400 MHz, CDCl<sub>3</sub>)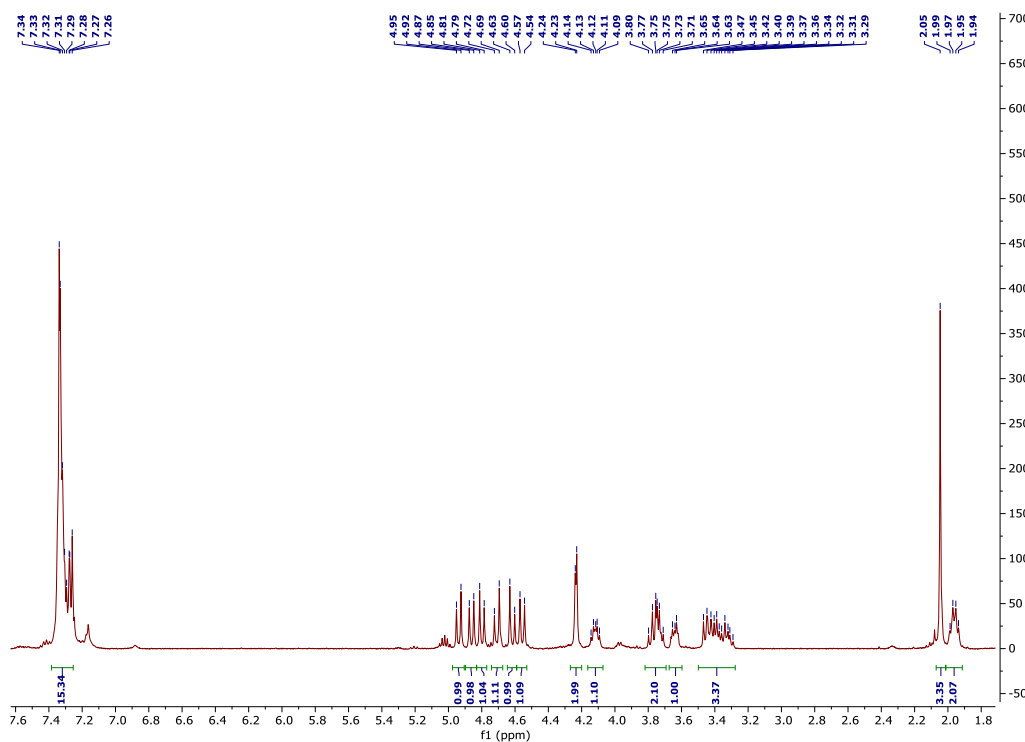

**Compound 12** $^1\text{H-NMR}$  (400 MHz,  $\text{CDCl}_3$ )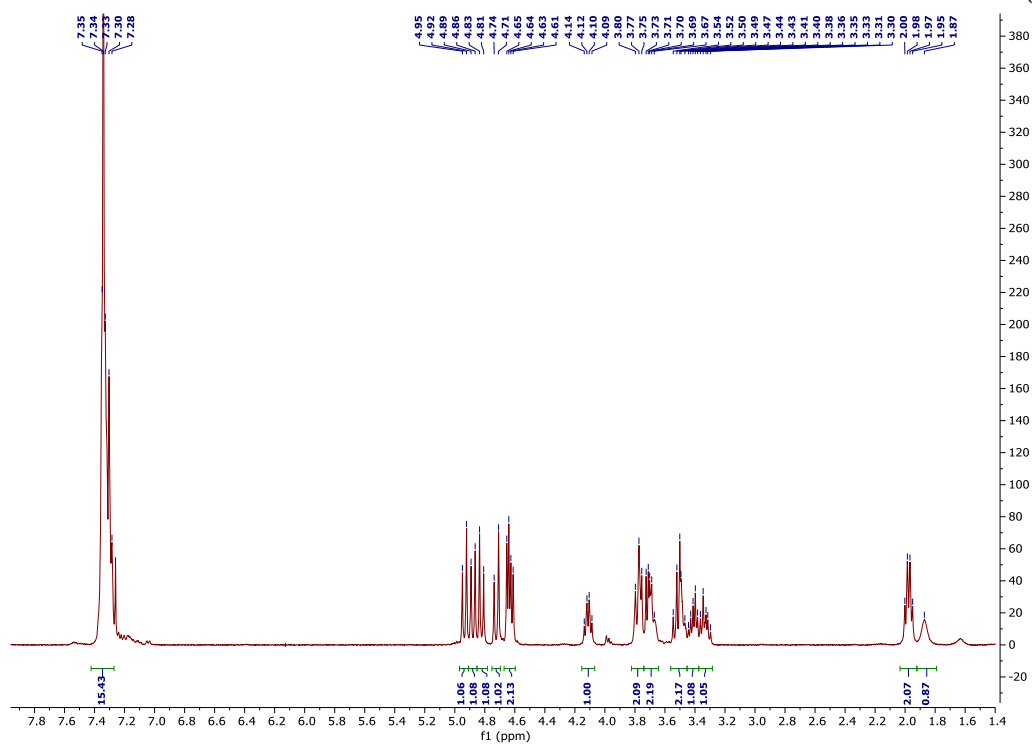**Compound 13** $^1\text{H-NMR}$  (400 MHz,  $\text{CDCl}_3$ )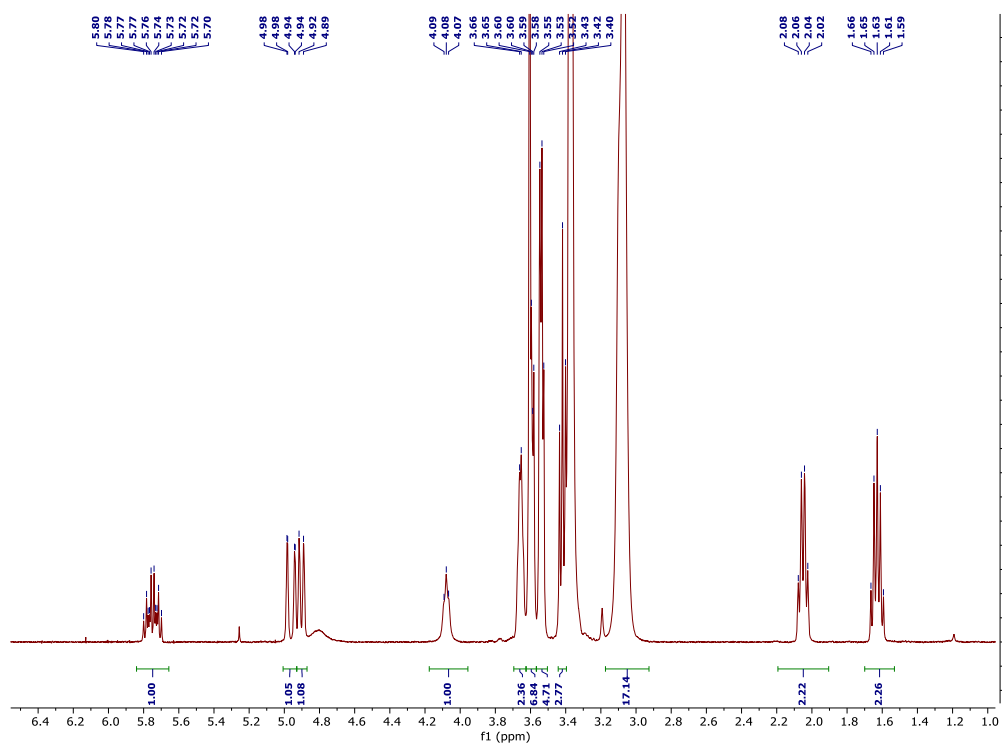



## Compound 14

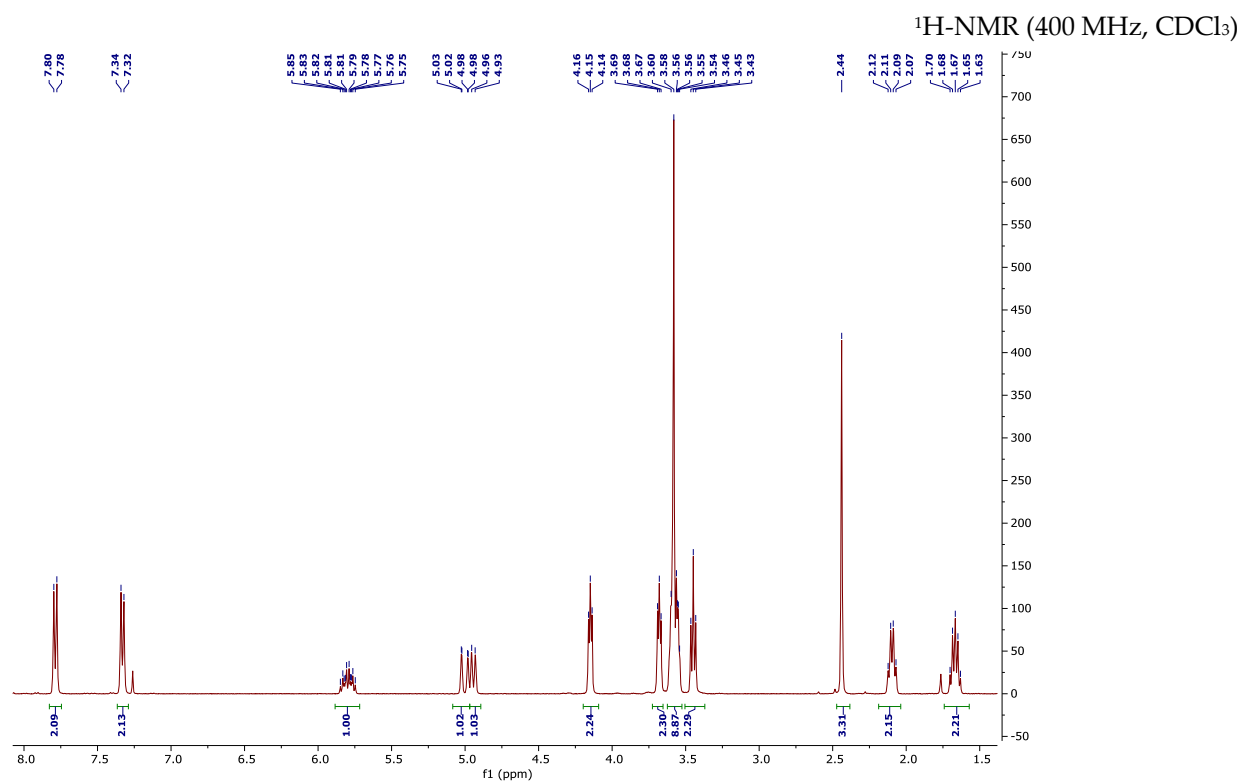

## Compound 15

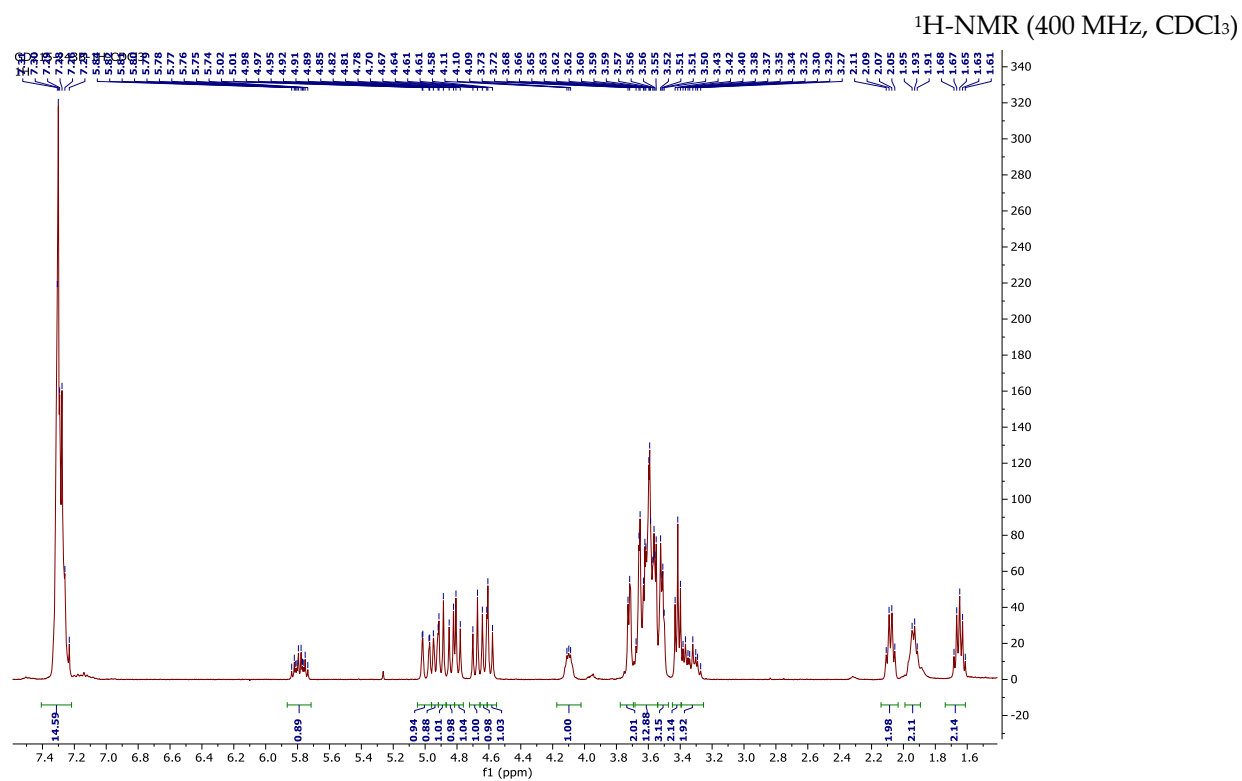

**Compound 16**

<sup>1</sup>H-NMR (400 MHz, CDCl<sub>3</sub>)

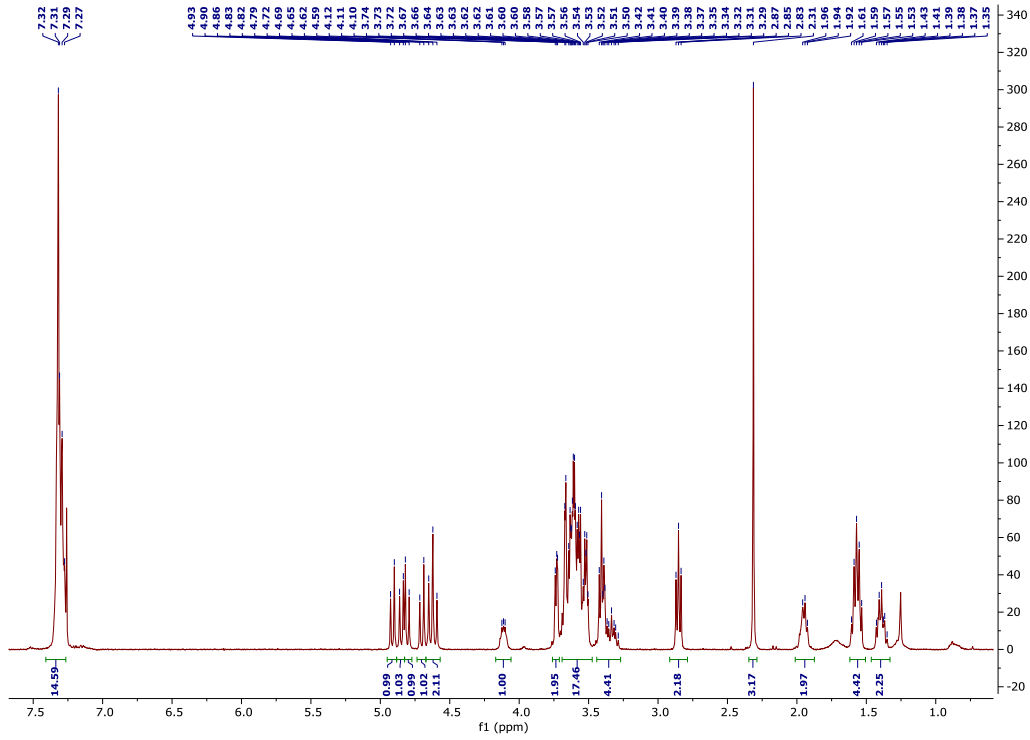

**Compound 17**

<sup>1</sup>H-NMR (400 MHz, CDCl<sub>3</sub>)

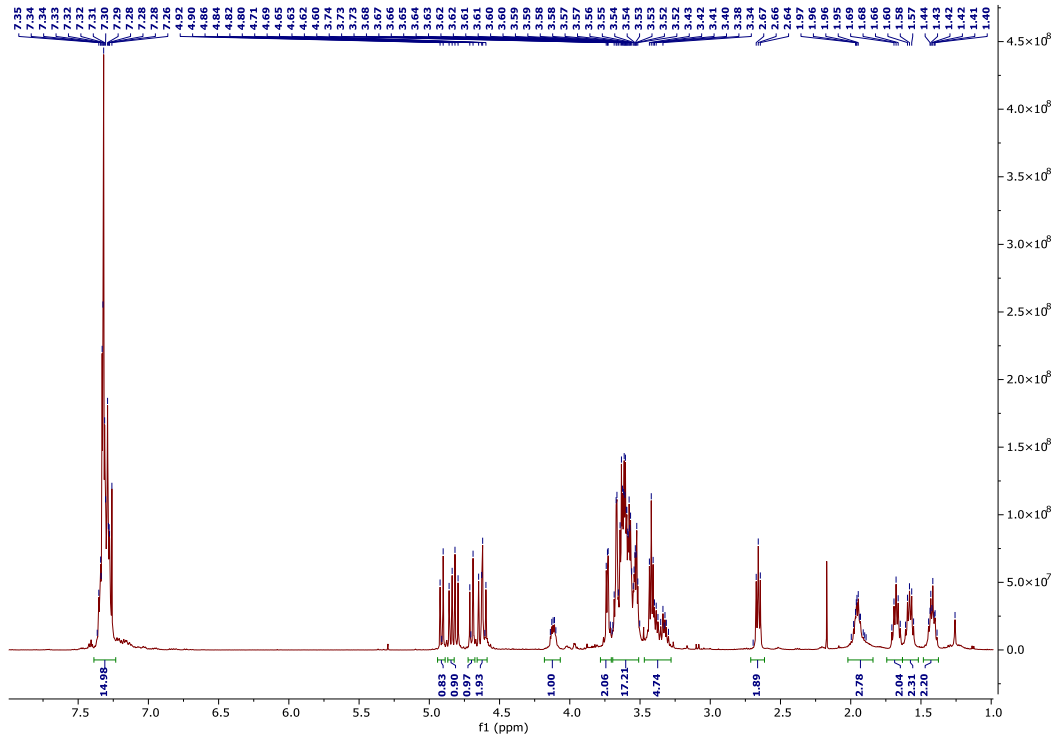

**Compound 18**<sup>1</sup>H-NMR (400 MHz, CD<sub>3</sub>OD)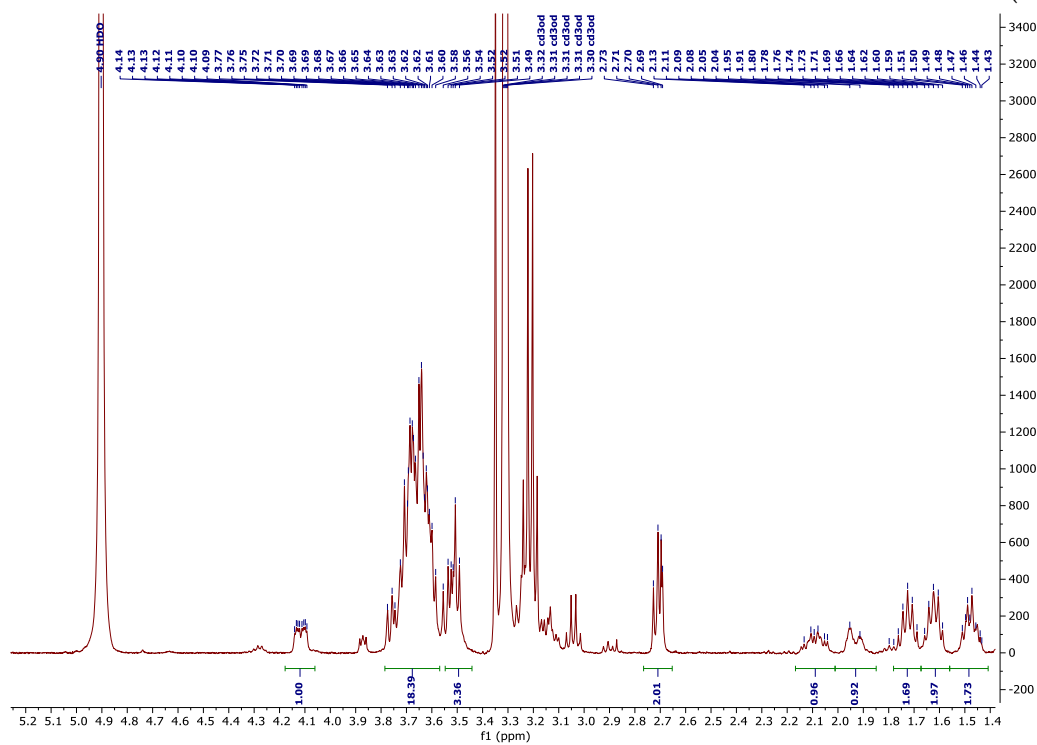**Compound 19**<sup>1</sup>H-NMR (400 MHz, CDCl<sub>3</sub>)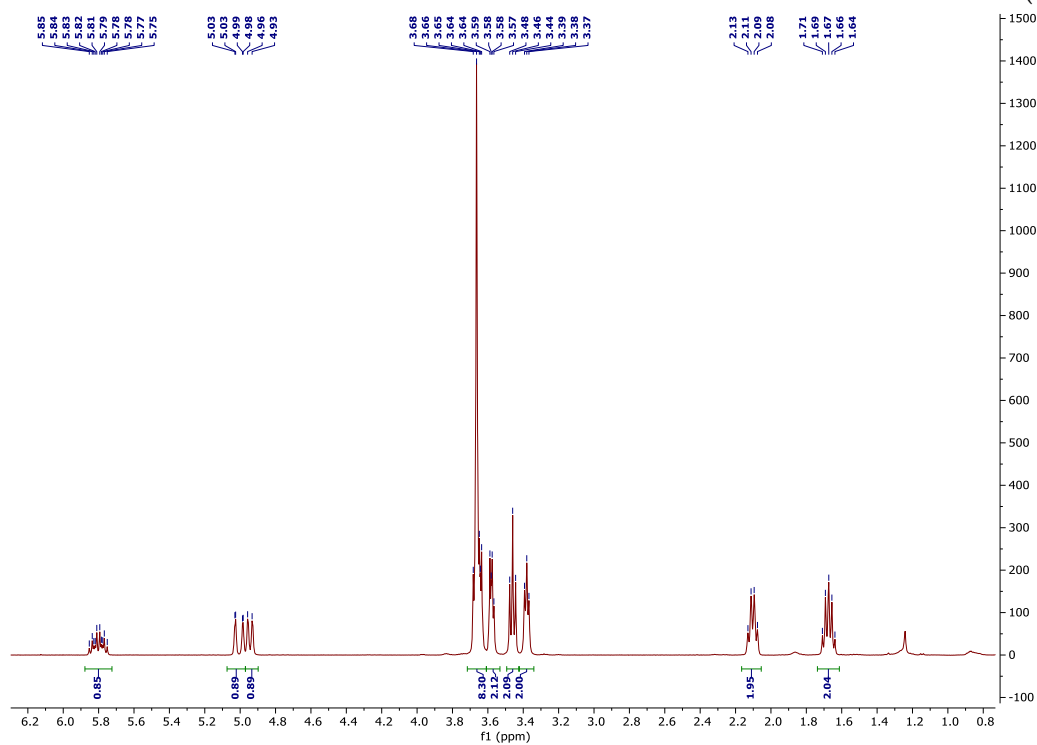

Compound 20

<sup>1</sup>H-NMR (400 MHz, CD<sub>3</sub>OD)

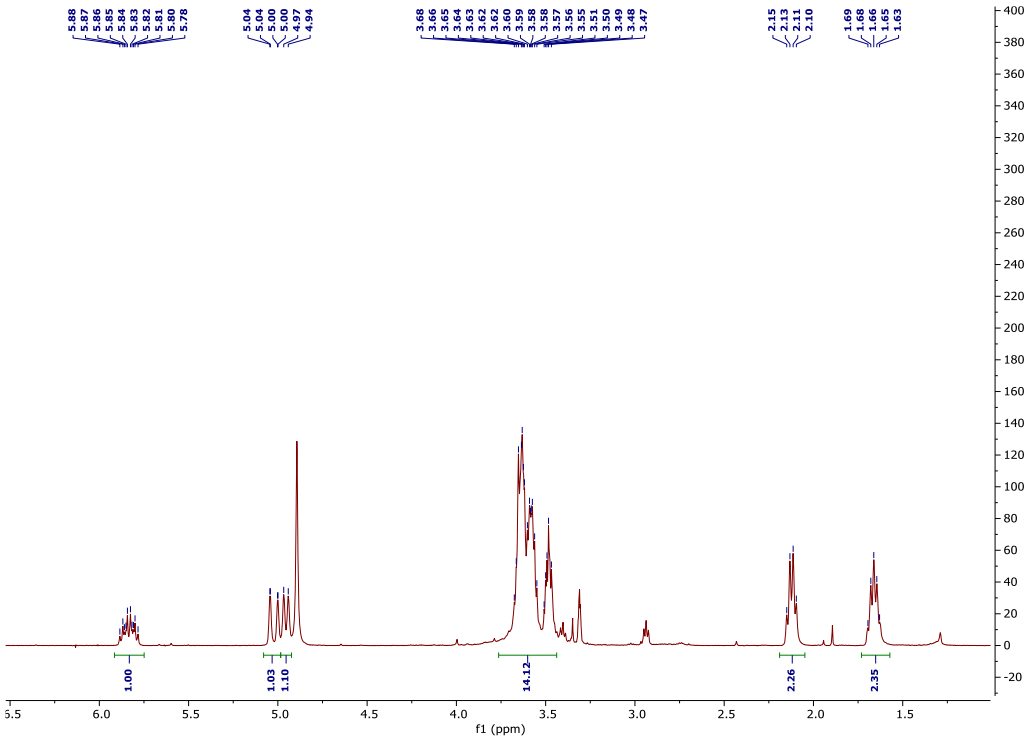

Compound 21

<sup>1</sup>H-NMR (400 MHz, CDCl<sub>3</sub>)

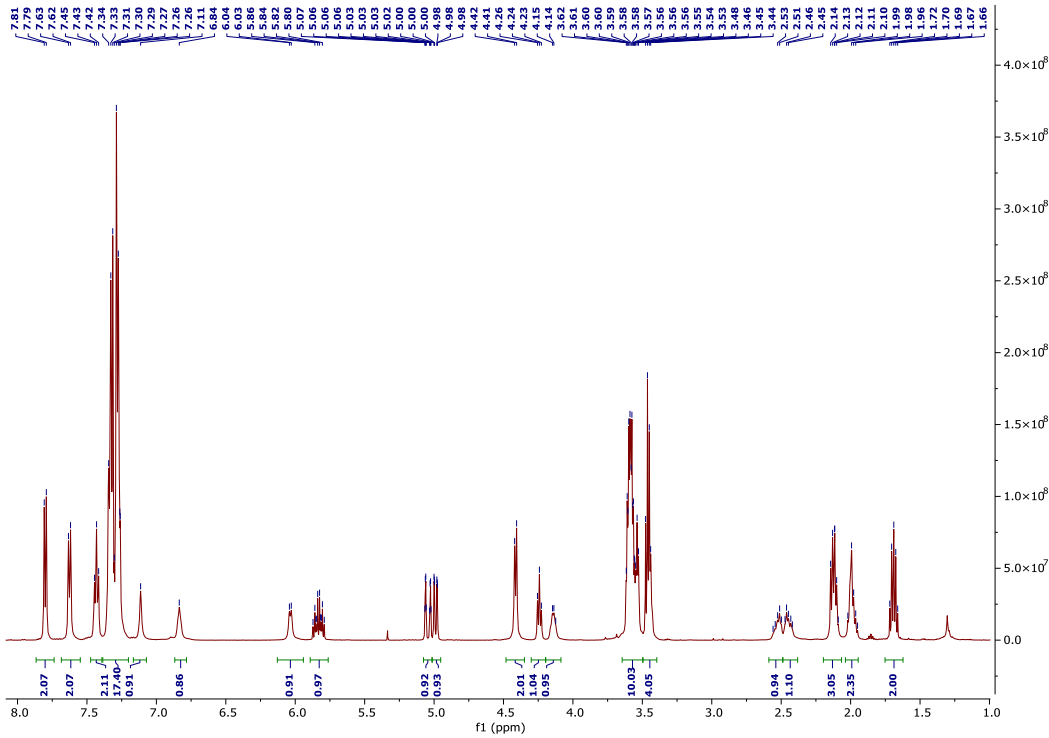

**Compound 22**

<sup>1</sup>H-NMR (400 MHz, CD<sub>3</sub>OD)

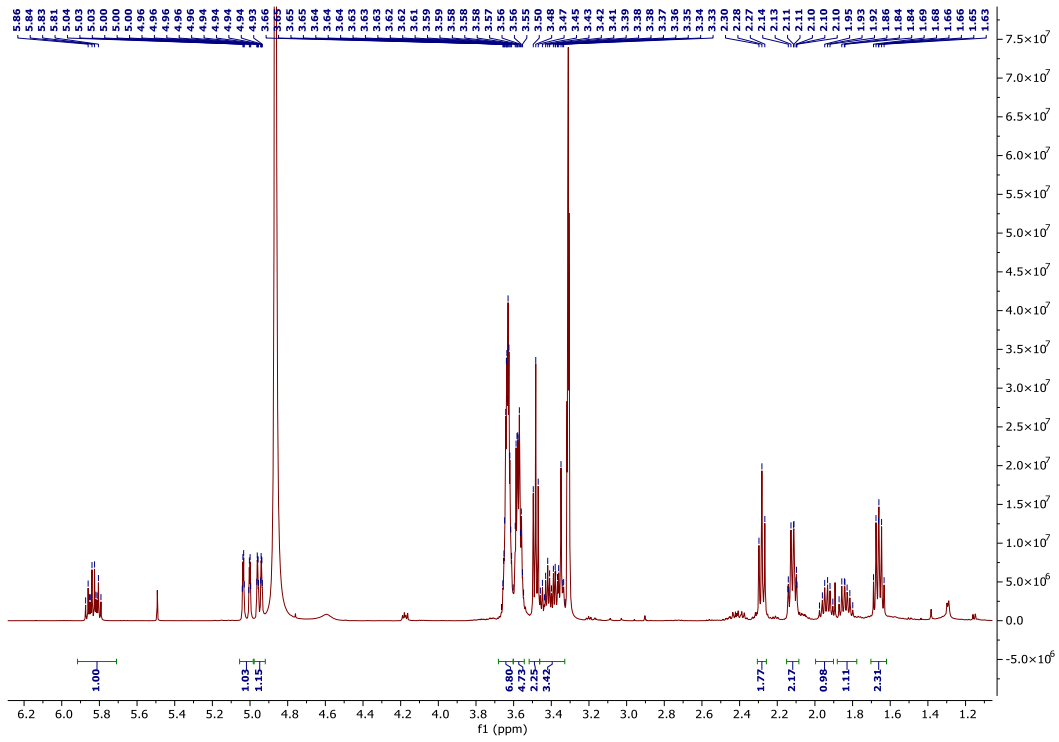

**Compound 23**

<sup>1</sup>H-NMR (400 MHz, CD<sub>3</sub>OD)

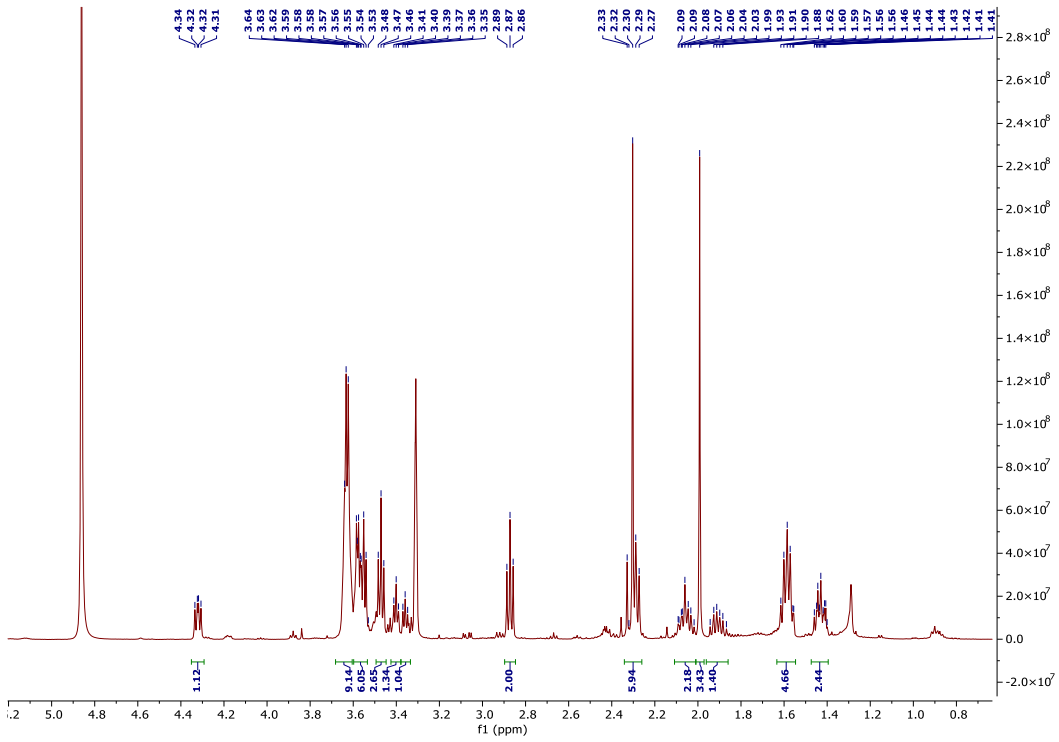

**Compound 24** $^1\text{H-NMR}$  (400 MHz,  $\text{CDCl}_3$ )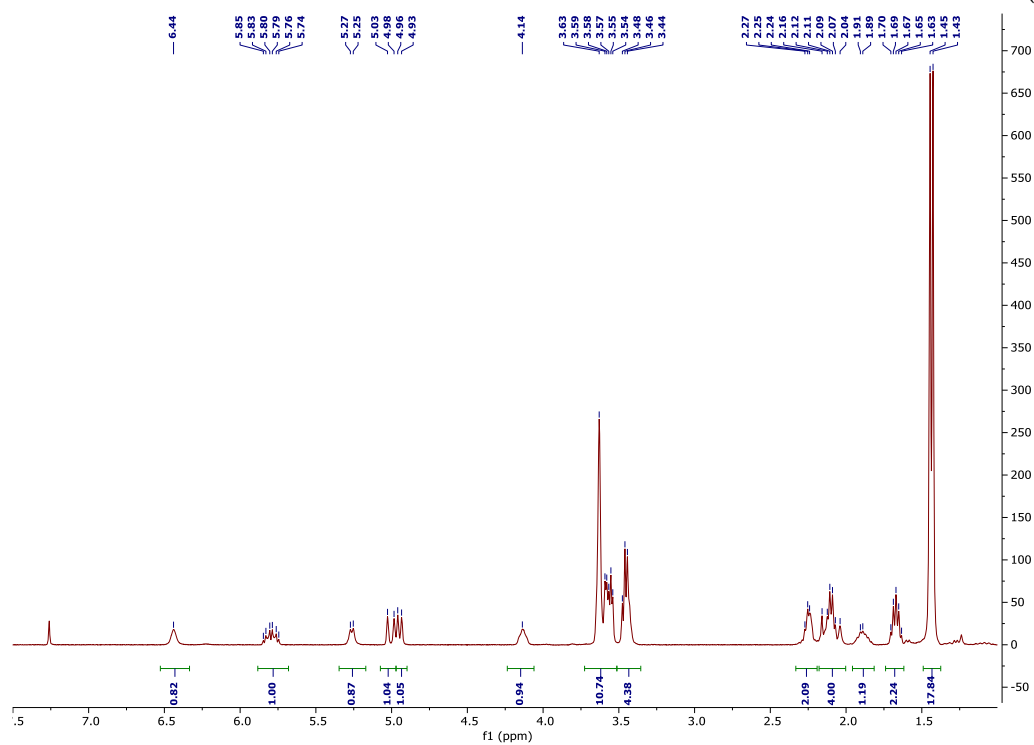**Compound 25** $^1\text{H-NMR}$  (400 MHz,  $\text{CD}_3\text{OD}$ )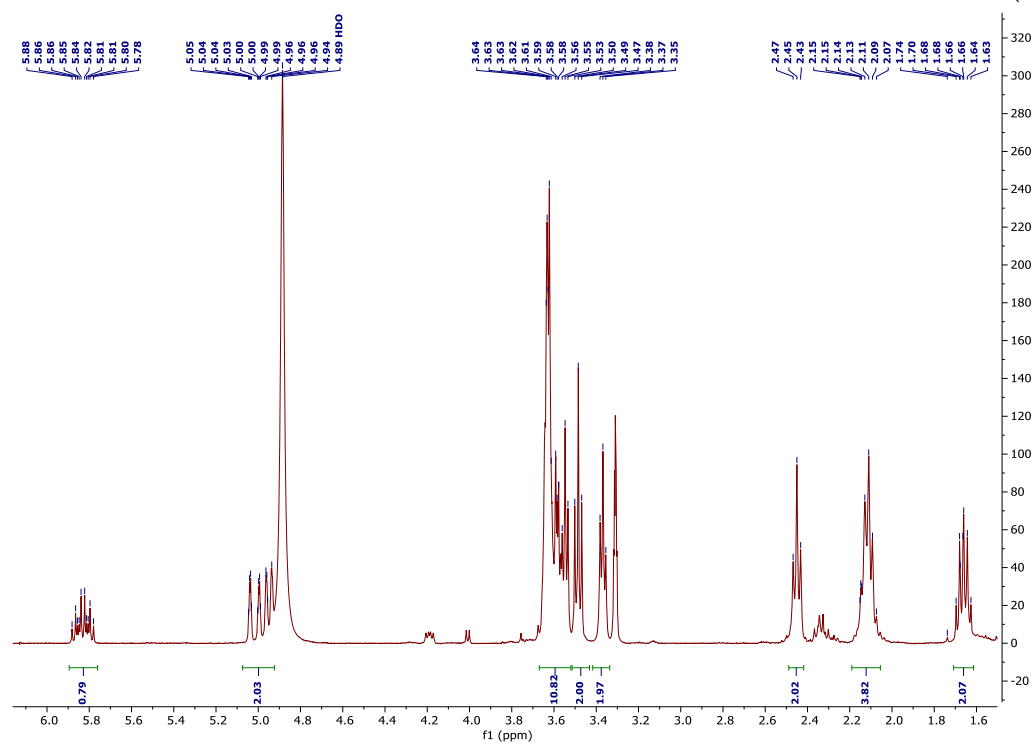

## Compound 26

 $^1\text{H-NMR}$  (400 MHz,  $\text{CD}_3\text{OD}$ )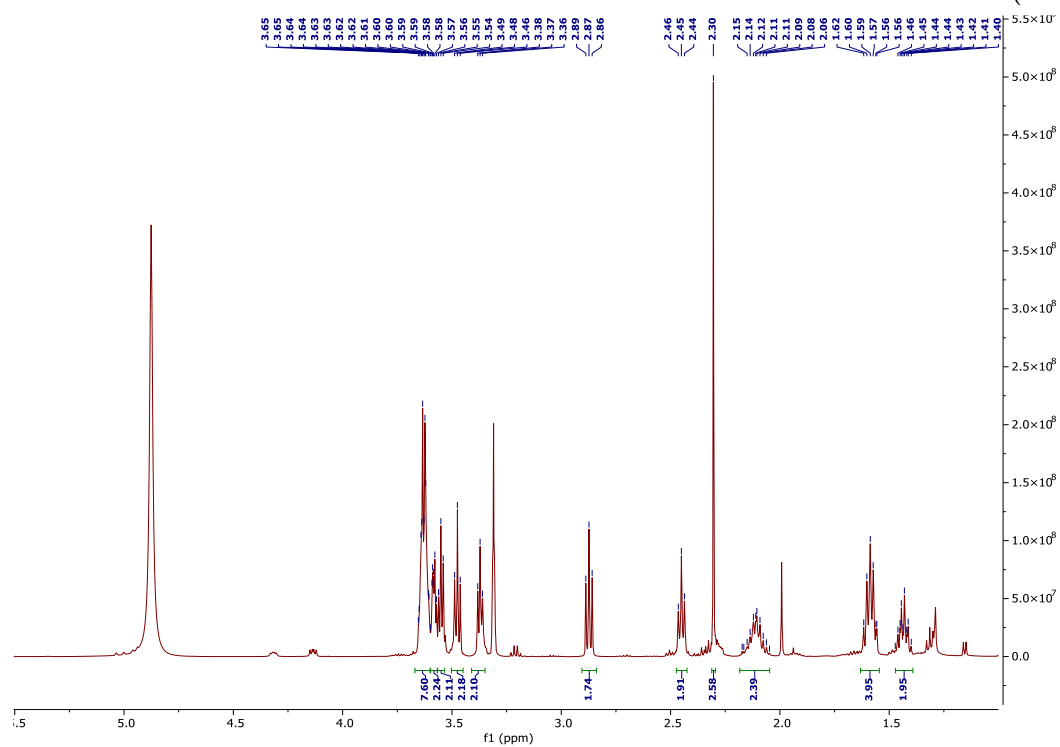

Supplement: s1 [file s1]
